# EACVI/HFA Cardiac Oncology Toxicity Registry in breast cancer patients: rationale, study design, and methodology (EACVI/HFA COT Registry)—EURObservational Research Program of the European Society of Cardiology

Patrizio Lancellotti<sup>1\*</sup>, Stefan D. Anker<sup>2</sup>, Erwan Donal<sup>3</sup>, Thor Edvardsen<sup>4,5</sup>, Bogdan A. Popescu<sup>6</sup>, Dimitrios Farmakis<sup>7</sup>, Gerasimos Filippatos<sup>7</sup>, Gilbert Habib<sup>8,9</sup>, Aldo P. Maggioni<sup>10,11</sup>, Guy Jerusalem<sup>12</sup>, and Maurizio Galderisi<sup>13</sup>

<sup>1</sup>University of Liège Hospital, GIGA Cardiovascular Science, Heart Valve Clinic, Imaging Cardiology, Belgium and GVM Care and Research, E.S. Health Science Foundation, Lugo (RA), Italy; <sup>2</sup>Department of Innovative Clinical Trials, University Medical Center Göttingen (UMG), Göttingen, Germany; <sup>3</sup>Cardiologie, CHU Rennes and LTSI-INSERM U 1099, Université Rennes 1, Rennes, France; <sup>4</sup>Department of Cardiology, Oslo University Hospital, Rikshospitalet and University of Oslo, Oslo, Norway; <sup>5</sup>Centre of Cardiological Innovation, Oslo, Norway; <sup>6</sup>University of Medicine and Pharmacy 'Carol Davila'—Eurocolab, 'Prof. Dr C. C. Iliescu' Institute of Cardiovascular Diseases, Bucharest, Romania; <sup>7</sup>Heart Failure Unit, Department of Cardiology, University Hospital 'Attikon', Athens, Greece; <sup>8</sup>Aix-Marseille Université, Marseille 13284, France; <sup>9</sup>Department of Cardiology, La Timone Hospital, 13005 Marseille, France; <sup>10</sup>ANMCO Research Center, Florence, Italy; <sup>11</sup>EORP Team, European Society of Cardiology, Sophia Antipolis, France; <sup>12</sup>Medical Oncology, CHU Sart Tilman Liège and Liège University, Liège, Belgium; and <sup>13</sup>Department of Advanced Biomedical Sciences, Federico II University Hospital, Naples, Italy

Received 23 January 2015; accepted after revision 30 January 2015; online publish-ahead-of-print 5 March 2015

The goal of adjuvant anti-cancer therapies is cure with limited or no side effects, in particular long-term side effects with negative impact on quality of life. In the palliative setting disease control, quality of life and overall survival are important end points. Partly due to improvements in treatment, the population of cancer survivors is large and growing. However, anti-cancer drug-related cardiotoxicity (ADRC) is the leading cause of treatment-associated mortality in cancer survivors. It is one of the most common post-treatment problems among 5- to 10-year survivors of adult cancer. This is particularly true for breast cancer, the most common cancer in women. The EACVI/HFA COT registry is designed for comprehensive data collection and evaluation of the current European practice in terms of diagnosis and management of ADRC in breast cancer patients. The COT registry will be carried out in two continuing phases, the pilot study phase involving 13 countries followed by the long-term registry in which all the 56 ESC countries will be invited to participate. With the COT registry, several critical information will be obtained: on predisposing factors for the development of ADRC, the rate of subclinical LV dysfunction and its transition to overt heart failure, the clinical impact and outcome of ADRC.

**Keywords** breast cancer • chemotherapy • cardiac toxicity • left ventricular function • biomarkers

## Cardiac toxicity of anti-breast cancer treatments

In the last decade, the cancer treatment has progressed considerably, by the introduction of targeted therapies, which increase cure and remission rate and convert cancer into a chronic disease.<sup>1</sup> The final result is an emerging cohort of millions of patients who will have a sufficient expectancy of life to experience cardiovascular (CV) adverse

effects of the anti-cancer therapies. This is particularly true for breast cancer, the most common cancer in women (464 000 new cases in Europe during 2012).<sup>2</sup> The introduction of adjuvant therapy (anthracyclines, taxanes, and, for patients with human epidermal growth factor receptor 2 (HER2)-positive disease, trastuzumab) remarkably improved both disease-free survival and overall mortality.<sup>3,4</sup> Age-adjusted 5-year survival among European women diagnosed with breast cancer from 2000 to 2002 is ~79%.<sup>5</sup> The prolonged

\* Corresponding author: EACVI/HFA COT Registry, Department of Cardiology, University of Liège Hospital, CHU Sart Tilman, B-35, 4000 Liège, Belgium. Tel: +32 4 366 71 94; Fax: +32 4 366 71 95. E-mail: plancellotti@chu.ulg.ac.be

Published on behalf of the European Society of Cardiology. All rights reserved. © The Author 2015. For permissions please email: journals.permissions@oup.com.

survival resulting from cancer treatment allows patients to live long enough that cardiac toxicity can be the main determinant of quality of life and in some cases of premature mortality.<sup>6</sup> Patients suffering from T1a-b N0 M0 breast cancer are at higher risk to die from heart disease than from the cancer itself.<sup>7</sup>

Although a number of therapies used in breast cancer patients are cardiotoxic,<sup>8</sup> most attention focuses on anthracyclines and on trastuzumab,<sup>9</sup> which are largely used in the adjuvant setting.<sup>10</sup>

Anthracyclines (such as doxorubicin), currently combined with cyclophosphamide as a first-step therapy, directly damage the myocardium through production of oxygen free radicals. This leads to necrosis and apoptosis of cardiac myocyte, subsequent left ventricular (LV) dysfunction, and, in some cases, to irreversible cardiomyopathy.<sup>11</sup> Anthracycline-related cardiotoxicity (*cardiotoxicity type 1*) is irreversible, cumulative, and dose dependent, with an incidence of overt heart failure (HF) of at least 2.2% of breast cancer patients receiving doxorubicin at 390 mg/m<sup>2</sup> median dose.<sup>12</sup> Anthracycline-induced cardiomyopathy has been associated with a 2-year mortality of up to 60%.<sup>12,13</sup> The cardiotoxic effects of anthracyclines can be potentiated by adjunctive chest irradiation.<sup>14</sup> Risk factors for anthracycline-related damage include prior use of these drugs, prior or current history of cardiac dysfunction, coronary artery disease, arterial hypertension, and age.<sup>15</sup>

Trastuzumab is a humanized monoclonal antibody against the extracellular domain of HER2 and is part of the standard treatment for breast cancer with HER2 overexpression and/or amplification. A series of large-scale studies has conclusively shown that trastuzumab can substantially reduce the risk of recurrence and early death in women with HER2-positive breast cancers. However, trastuzumab significantly alters the expression of myocardial genes for DNA repair, which is associated with ultrastructural alterations in cardiomyocytes, and also promotes oxidative stress and apoptosis of myocardium.<sup>16,17</sup> Type II cardiotoxicity from trastuzumab is not tied to cumulative dose but to number of treatment sessions, manifesting as a decrease of LV systolic function, which is more reversible than anthracycline damage. Trastuzumab also increases the risk of cardiac side effects in patients with pre-existing forms of heart disease in which the cardiac stress signals are presumably already activated.<sup>18</sup> Trastuzumab-induced HF occurs in up to 4% of patients treated with the antibody, whereas ~14% of patients have a drop in LV ejection fraction (LVEF) responsible for therapy discontinuation.<sup>19</sup>

In breast cancer patients, trastuzumab is often used sequentially after anthracycline therapy completion. This sequential combination is potentially dangerous since trastuzumab potentiates the anthracycline cardiotoxicity. Combining anthracyclines with trastuzumab in the metastatic setting can cause severe HF in 27% of cases, compared with 13% taking paclitaxel (taxanes) and trastuzumab, and <7% expected taking anthracyclines alone.<sup>20</sup>

## Rationale for the Cardiac Oncology Toxicity (COT) Registry

In the abovementioned clinical context, several issues remain controversial. First of all, by selecting breast cancer patients with a few co-morbidities, some clinical trials reported fairly low rates of protocol-defined cardiotoxicity.<sup>3,21</sup> These data raise concerns

about type 1 and 2 cardiotoxicity prevalence. On the other hand, a substantial fraction of breast cancer patients experience asymptomatic alterations in LVEF with both anthracyclines and trastuzumab.<sup>22–24</sup> Although these alterations are considered to be largely benign and reversible within a period of 2–4 months after trastuzumab discontinuation, irreversible LV systolic dysfunction has been documented in up to 40% of patients treated with trastuzumab after anthracycline.<sup>25</sup> The rate, clinical meaning, evolution and persistence of these asymptomatic changes do not appear to be fully elucidated.

Echocardiography, brain natriuretic peptide (BNP), and cardiac troponins are investigational means to detect pre-symptomatic LV damage and evaluate cardioprotective treatments.<sup>26–30</sup> Monitoring cardiac function before, during, and after treatment helps doctors to detect early cardiac damage, enabling regimen modifications. This strategy is, however, controversial too, and in the absence of clear guidelines, practice varies widely. Also, the definition of asymptomatic LV systolic dysfunction varies according to studies and centres.

In addition, early treatment of LV dysfunction is important, considering the correlation between the onset time of LV dysfunction treatment and recovery (the faster the treatment, the better the results). An asymptomatic decrease in LVEF is an indication for therapy with  $\beta$ -blockers and angiotensin-converting enzyme inhibitors or angiotensin receptor blockers in the management of HF in adults according to current ESC guidelines.<sup>31</sup> The cardioprotective effect of these drugs in breast cancer patients undergoing chemotherapy has been recently highlighted.<sup>32–35</sup> However, nearly all the corresponding studies are observational/retrospective, limited in sample size and not randomized. Moreover, to date, many cancer survivors are not receiving treatment, in disagreement with HF guidelines.

Further, the limited data available on presentation and management of patients with ADRC are derived mainly from clinical trials that—because of stringent exclusion criteria—do not reflect the current daily practice. To date, information on ADRC in breast cancer patients is largely variable or incomplete.<sup>36</sup> Also, information on cardiac imaging practice for the detection and follow-up of ADRC as well as on how imaging and biomarkers are integrated into clinical routine in Europe is lacking. Hence, a comprehensive systematic clinical assessment of breast cancer patients with ADRC in a large European registry compiling all relevant information would help to better understand how serious this disease is and how ADRC is managed and affects the outcome and quality of life of these patients in the real world. Such a registry could represent a substantial opportunity for collaboration between oncologists and cardiologists and the basis of the development of specific ADRC studies and guidelines.

## Objectives of the COT Registry

The EACVI/HFA COT registry has been designed to examine clinical, cardiac imaging and treatment practices for ADRC in breast cancer in Europe. The main scopes are as follows: (i) to define risk factors, clinical profiles and epidemiology associated with ADRC; (ii) to determine clinical outcome and predictors of ADRC; (iii) to report the proportion of asymptomatic and symptomatic ADRC; (iv) to describe the time course of ADRC according to the initiation of chemotherapy; (v) to record the current standards for diagnostic workup (cardiac imaging/biomarkers) and clinical follow-up of patients; (vi)

to assess the changes in treatment regimen (completion of planned chemotherapy)/therapy (adjunctive drugs) related to ADRC and their impacts on ADRC; (vii) to describe the types of cardioprotective drugs and other treatment approaches used for ADRC; and (viii) to evaluate treatment adherence to ESC guidelines for HF or asymptomatic LV dysfunction.

## Study design

The EACVI/HFA COT registry is a prospective, multicentre [European countries, homogeneously distributed across Europe (North, South, East, Central/West)], observational study of patients presenting to imaging labs according to an oncologist's request and followed by cardiology or oncology centres in European countries (Table 1). The registry is performed under the umbrella of the EURObservational Research Program (EORP) of the European Society of Cardiology (ESC) (<https://www.eorp.org/>) and will be carried out in two continuing phases, the short pilot study phase followed by the long-term registry. To note, about one-fourth of the participating centres hold EACVI laboratory accreditation/individual certification in echocardiography. Consecutive breast cancer patients treated or to be treated by chemotherapy or any other anti-cancer treatments with known potential cardiac toxicity undergoing a cardiac imaging test for routine surveillance of LV function or evaluation of HF symptoms or suspected ADRC with or without confirmed LV dysfunction will be enrolled in the registry (Figure 1). Exclusion criteria include all patients with a history of pre-chemotherapy LV dysfunction. Duration of the enrolment period will be 12 months.

## Collected variables and follow-up

Baseline data for each enrolled patient will include demographic characteristics, risk factors for CV diseases, co-morbidities including cancer history, clinical signs and symptoms, data on LV function and method of measure, types of biomarkers (troponin, BNP) used, current use of cardiac pharmacological treatments, chemotherapy,

radiotherapy and breast surgical history and reconstruction surgery. A follow-up within 30 days, 6 and 12 months will be scheduled for all patients. A longer follow-up (5-year) will be obtained in the long-term registry.

The follow-up data will be captured by phone or during a visit to the centre for each enrolled patient and consists of monitoring regimen, types of cardiac imaging applied [(Echo [2D/3D], contrast, strain imaging), nuclear cardiology with MUGA (Volumes, LVEF, Perfusion), cardiac magnetic resonance (CMR) (function, fibrosis), stress test (contractile reserve)], types of biomarkers used (troponin, pro-BNP), evolution of LVEF (improved, stable, worsening), clinical signs and symptoms of HF, cause of death, cardioprotective drugs used (e.g. iron chelator dexrazoxane,  $\beta$ -blockers, ACE inhibitors, angiotensin receptor blockers, statins), and reasons for non-prescription of drugs (also recommended dosage) with a Class I recommendation in HF. If possible, a comprehensive echocardiographic evaluation will be obtained at the end of the follow-up study.

## Statistical analysis

Considering the explorative and observational nature of the current study, no formal sample size will be calculated. All the patients enrolled will be included in the analyses. Normal distribution of variables will be verified using the Kolmogorov–Smirnov test. Normally distributed continuous data will be expressed as mean values ( $\pm$  SD). Non-normally distributed continuous data will be expressed as median (inter-quartile range). Differences between groups will be analysed for statistical significance with the one-way analysis of variance (ANOVA),  $\chi^2$  test, or Fisher exact test as appropriate. Categorical variables will be reported as percentage. Non-normal data (e.g. troponin, BNP) will be logarithmic transformed before correlative analysis. Multivariable statistical models will be used to explore the relationships between baseline covariates and post-baseline predefined end points, as appropriate. A value of  $P < 0.05$  will be considered as statistically significant.

**Table 1** Invited countries and national co-ordinators

| Invited country | Name of national co-ordinator |
|-----------------|-------------------------------|
| Belgium         | Guy Jerusalem                 |
| France          | Erwan Donal<br>Gilbert Habib  |
| Germany         | Andreas Hagendorff            |
| Greece          | George Athanassopoulos        |
| Hungary         | Laszlo Gellér                 |
| Italy           | Maurizio Galderisi            |
| Norway          | Thor Edvardsen                |
| Poland          | Edyta Plonska-Gosciniak       |
| Portugal        | Nuno Miguel Cardim            |
| Romania         | Bogdan A. Popescu             |
| Russia          | Simon Matskeplishvili         |
| Spain           | Pepe Zamorano                 |
| UK              | Madalina Garbi                |

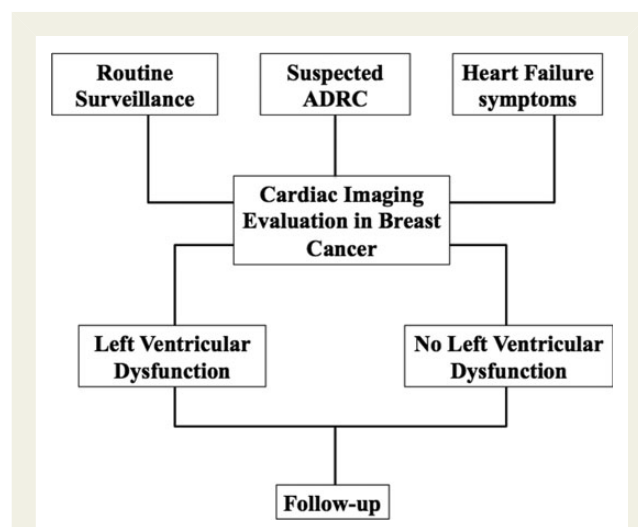

**Figure 1** Study population selection and imaging entry point into the EACVI/HFA COT registry. Left ventricular dysfunction refers to a significant drop in left ventricular systolic function.

## Ethical committee

The EACVI/HFA COT registry will be conducted according to the rules for research in human subjects. Protection of privacy with regards to processing of individual data will be ensured according to the National rules for observational research. The institutional ethical committee of the participating centres will approve the project. Local Institutional Review Boards will approve the study, and all patients will sign an informed consent in accordance with privacy respect and national and local guidelines.

## Discussion

The EACVI/HFA COT registry is a centre-based data collection designed for comprehensive evaluation of the current European practice in terms of diagnosis and management of ADRC in breast cancer patients. The COT registry will be the first study to collect sizeable observational contemporary data on cardiac toxicity and ADRC-related subclinical LV dysfunction in relation and independent of co-morbidities on a large sample size of breast cancer patients within European countries in the real-life setting. With the COT registry, several critical information will be obtained: predisposing factors for the development of ADRC, rate of subclinical LV dysfunction and its transition to overt HF, clinical impact and outcome of ADRC.

Overall, the EACVI/HFA COT registry will serve to confirm or not in the real world the results of the clinical trials. By refining the predisposing factors, documenting the disease progression, highlighting the treatment practices, and demonstrating the gaps in adherence to HF guidelines, the COT registry has the unique ambition to assist the healthcare providers, more specifically the oncologist and cardiologist communities, to improve their knowledge about the ADRC to set up common strategies to possibly address new forms of prevention and treatment of the disease.

Also, with its unique cardiac imaging laboratories entry point in the short-term pilot phase, the COT registry will specifically address important issues regarding the imaging use in the diagnostic workup and monitoring of breast cancer patients with suspected/confirmed ADRC. The implementation of new imaging findings (myocardial fibrosis, perfusion imaging defect, contractile reserve) in the assessment and management of ADRC will also be estimated.

## Future perspectives

After completion of the first short-term pilot phase (1-year inclusion and 1-year follow-up), specifically aimed at validating the structure, performance, and quality of the data set, a long-term country-based registry will be set up to have a broader representation of European countries and to obtain a larger sample of collected data over a longer duration. Beyond the longer outcome, the long-term COT registry will investigate: (i) the prevalence of symptomatic/asymptomatic and subclinical ADRC; (ii) the clinical meaning and persistence of subclinical LV dysfunction; (iii) the clinical value of cardiac imaging in comparison and in combination with biomarkers for the diagnosis and monitoring of ADRC; and (iv) the optimal timing for cardiac surveillance of breast cancer patients. In a second step, the COT registry

could also serve as a framework to conduct a broader registry including other types of cancers.

## Limitations

Data derived from the EACVI/HFA COT registry will be limited by their observational nature. Since the entry point into the study will be the imaging laboratories, the collected data might not be transposed to all patients with breast cancer. However, by using such an entry point, all breast cancer patients with suspected ADRC will be enrolled and evaluated. For a similar reason, the prevalence of the ADRC will not be assessable in the first phase of the study. Conversely, the long-term country-based COT registry will better characterize the importance of the ADRC.

## Conclusion

The COT registry is the first EORP project carried out jointly by the EACVI and HFA under the umbrella of the ESC. Thanks to the EACVI/HFA COT registry, a comprehensive mapping of the current diagnostic and therapeutic approaches to ADRC across Europe will be for the first time available. Implementing the COT results into clinical practice will likely improve the collaboration/connexion with the oncologists in charge of breast cancer patients and promote larger scale prospective research studies in the field with the ESC.

## Acknowledgements

The EACVI/HFA thank the EORP staff at the Heart House for their support. Steering committee—EACVI: Patrizio Lancellotti (Chair), Erwan Donal, Thor Edvardsen, Maurizio Galderisi, Gilbert Habib, Bogdan A. Popescu; HFA: Stephan Anker (Co-Chair), Dimitrios Farmakis, Gerasimos Filippatos, HFA Oncologist: Guy Jerusalem; EORP: Aldo P Maggioni.

**Conflict of interest:** G. J. received honorarium and research funding from Roche. S. D. A. received consulting fees from Aveo Oncology, Psioxus, and Novartis.

## Funding

The ESC-COT registry will be funded by the ESC. At present, the following companies support the EURObservational Research Programme: Abbot Vascular Int., Amgen, AstraZeneca, Bayer Pharma AG, Boehringer Ingelheim, The Bristol Myers Squibb and Pfizer alliance, The Alliance Daiichi Sankyo Europe GmbH and Eli Lilly and Company, Gedeon Richter Plc., Novartis Pharma AG, ResMed, SERVIER.

## References

1. Todaro MC, Oreto L, Qamar R, Paterick TE, Carerj S, Khandheria BK. Cardioncology: state of the heart. *Int J Cardiol* 2013;**168**:680–7.
2. Ferlay J, Steliarova-Foucher E, Lortet-Tieulent J, Rosso S, Coebergh JW, Comber H et al. Cancer incidence and mortality patterns in Europe: estimates for 40 countries in 2012. *Eur J Cancer* 2013;**49**:1374–403.
3. Piccart-Gebhart MJ, Procter M, Leyland-Jones B, Goldhirsch A, Untch M, Smith I et al. Trastuzumab after adjuvant chemotherapy in HER2-positive breast cancer. *N Engl J Med* 2005;**353**:1659–72.
4. Smith I, Procter M, Gelber RD, Guillaume S, Feyereislova A, Dowsett M et al. 2-year follow-up of trastuzumab after adjuvant chemotherapy in HER2-positive breast cancer: a randomised controlled trial. *Lancet* 2007;**369**:29–36.
5. Verdecchia A, Francisci A, Brenner H, Gatta G, Micheli A, Mangone L et al. Recent cancer survival in Europe: a 2000–02 period analysis of EURO CARE-4 data. *Lancet Oncol* 2007;**8**:784–96.



6. Bowles EJ, Wellman R, Feigelson HS, Onitilo AA, Freedman AN, Delate T et al. Risk of heart failure in breast cancer patients after anthracycline and trastuzumab treatment: a retrospective cohort study. *J Natl Cancer Inst* 2012;**104**:1293–305.
7. Hanrahan EO, Gonzalez-Angulo AM, Giordano SH, Rouzier R, Broglio KR, Hortobagyi GN et al. Overall survival and cause-specific mortality of patients with stage T1a,bN0M0 breast carcinoma. *J Clin Oncol* 2007;**25**:4952–60.
8. Jones LW, Haykowsky MJ, Swartz JJ, Douglas PS, Mackey JR. Early breast cancer therapy and cardiovascular injury. *J Am Coll Cardiol* 2007;**50**:1435–41.
9. Plana JC, Galderisi M, Barac A, Ewer MS, Ky B, Scherrer-Crosbie M et al. Expert consensus for multi-modality imaging evaluation of adult patients during and after cancer therapy: a report from the American Society of Echocardiography and the European Association of Cardiovascular Imaging. *Eur Heart J Cardiovasc Imaging* 2014;**15**:1063–93.
10. Brower V. Cardiotoxicity debated for anthracyclines and trastuzumab in breast cancer. *J Natl Cancer Inst* 2013;**105**:835–6.
11. Sawyer DB, Peng X, Chen B, Pentassuglia L, Lim CC. Mechanisms of anthracycline cardiac injury: can we identify strategies for cardioprotection? *Prog Cardiovasc Dis* 2010;**53**:105–13.
12. Von Hoff DD, Layard MW, Basa P, Davis HL Jr, Von Hoff AL, Rozenzweig M et al. Risk factors for doxorubicin-induced congestive heart failure. *Ann Intern Med* 1979;**91**:710–7.
13. Felker GM, Thompson RE, Hare JM, Hruban RH, Clemetson DE, Howard DL et al. Underlying causes and long-term survival in patients with initially unexplained cardiomyopathy. *N Engl J Med* 2000;**342**:1077–84.
14. Lancellotti P, Nkomo VT, Badano LP, Bergler-Klein J, Bogaert J, Davin L et al. Expert consensus for multi-modality imaging evaluation of cardiovascular complications of radiotherapy in adults: a report from the European Association of Cardiovascular Imaging and the American Society of Echocardiography. *Eur Heart J Cardiovasc Imaging* 2013;**14**:721–40.
15. Aapro M, Bernard-Marty C, Brain EG, Batist G, Erdkamp F, Krzemieniecki K et al. Anthracycline cardiotoxicity in the elderly cancer patient: a SIOG expert position paper. *Ann Oncol* 2011;**22**:257–67.
16. El Zarrad MK, Mukhopadhyay P, Mohan N, Hao E, Dokmanovic M, Hirsch DS et al. Trastuzumab alters the expression of genes essential for cardiac function and induces ultrastructural changes of cardiomyocytes in mice. *PLoS One* 2013;**8**:e79543.
17. Chien KR. Herceptin and the heart—a molecular modifier of cardiac failure. *N Engl J Med* 2006;**354**:789–90.
18. Slamon DJ, Leyland-Jones B, Shak S, Fuchs H, Paton V, Bajamonde A et al. Use of chemotherapy plus a monoclonal antibody against her2 for metastatic breast cancer that overexpresses HER2. *N Engl J Med* 2001;**344**:783–92.
19. Telli ML, Hunt SA, Carlson RW, Guardino AE. Trastuzumab-related cardiotoxicity: calling into question the concept of reversibility. *J Clin Oncol* 2007;**25**:3525–33.
20. Slamon D, Eiermann W, Robert N, Pienkowski T, Martin M, Press M et al. Adjuvant trastuzumab in HER2-positive breast cancer. *N Engl J Med* 2011;**365**:1273–83.
21. Romond EH, Jeong JH, Rastogi P, Swain SM, Geyer CE Jr, Ewer MS et al. Seven-year follow-up assessment of cardiac function in NSABP B-31, a randomized trial comparing doxorubicin and cyclophosphamide followed by paclitaxel (ACP) with ACP plus trastuzumab as adjuvant therapy for patients with node-positive, human epidermal growth factor receptor 2-positive breast cancer. *J Clin Oncol* 2012;**30**:3792–9.
22. Negishi K, Negishi T, Hare JL, Haluska BA, Plana JC, Marwick TH. Independent and incremental value of deformation indices for prediction of trastuzumab-induced cardiotoxicity. *J Am Soc Echocardiogr* 2013;**26**:493–8.
23. Yoon GJ, Telli ML, Kao DP, Matsuda KY, Carlson RW, Witteles RM. Left ventricular dysfunction in patients receiving cardiotoxic cancer therapies are clinicians responding optimally? *J Am Coll Cardiol* 2010;**56**:1644–50.
24. Negishi K, Negishi T, Haluska BA, Hare JL, Plana JC, Marwick TH. Use of speckle strain to assess left ventricular responses to cardiotoxic chemotherapy and cardioprotection. *Eur Heart J Cardiovasc Imaging* 2014;**15**:324–31.
25. Cardinale D, Colombo A, Torrisi R, Sandri MT, Civelli M, Salvatici M et al. Trastuzumab-induced cardiotoxicity: clinical and prognostic implications of troponin I evaluation. *J Clin Oncol* 2010;**28**:3910–6.
26. Subar M, Lin W, Chen W, Pittman DG. Lack of uniformity in cardiac assessment during trastuzumab therapy. *Breast J* 2011;**17**:383–90.
27. Civelli M, Cardinale D, Martinoni A, Lamantia G, Colombo N, Colombo A et al. Early reduction in left ventricular contractile reserve detected by dobutamine stress echo predicts high-dose chemotherapy-induced cardiac toxicity. *Int J Cardiol* 2006;**111**:120–6.
28. Fallah-Rad N, Walker JR, Wassef A, Lytwyn M, Bohonis S, Fang T et al. The utility of cardiac biomarkers, tissue velocity and strain imaging, and cardiac magnetic resonance imaging in predicting early left ventricular dysfunction in patients with human epidermal growth factor receptor II-positive breast cancer treated with adjuvant trastuzumab therapy. *J Am Coll Cardiol* 2011;**57**:2263–70.
29. Sawaya H, Sebag IA, Plana JC, Januzzi JL, Ky B, Tan TC et al. Assessment of echocardiography and biomarkers for the extended prediction of cardiotoxicity in patients treated with anthracyclines, taxanes, and trastuzumab. *Circ Cardiovasc Imaging* 2012;**5**:596–603.
30. Colombo A, Cardinale D. Using cardiac biomarkers and treating cardiotoxicity in cancer. *Future Cardiol* 2013;**9**:105–18.
31. McMurray JJ, Adamopoulos S, Anker SD, Auricchio A, Böhm M, Dickstein K et al. ESC Guidelines for the diagnosis and treatment of acute and chronic heart failure 2012: the Task Force for the Diagnosis and Treatment of Acute and Chronic Heart Failure 2012 of the European Society of Cardiology. Developed in collaboration with the Heart Failure Association (HFA) of the ESC. *Eur Heart J* 2012;**33**:1787–847.
32. Seicean S, Seicean A, Alan N, Plana JC, Budd GT, Marwick TH. Cardioprotective effect of beta-adrenoceptor blockade in patients with breast cancer undergoing chemotherapy: follow-up study of heart failure. *Circ Heart Fail* 2013;**6**:420–6.
33. Oliva S, Cioffi G, Frattini S, Simoncini EL, Faggiano P, Boccardi L et al. Administration of angiotensin-converting enzyme inhibitors and betablockers during adjuvant trastuzumab chemotherapy for nonmetastatic breast cancer: marker of risk or cardioprotection in the real world? *Oncologist* 2012;**17**:917–24.
34. Bosch X, Rovira M, Sitges M, Doménech A, Ortiz-Piérrez JT, de Caralt TM et al. Enalapril and carvedilol for preventing chemotherapy-induced left ventricular systolic dysfunction in patients with malignant hemopathies: the OVERCOME trial (prevention of left Ventricular dysfunction with Enalapril and carvedilol in patients submitted to intensive Chemotherapy for the treatment of Malignant hEmopathies). *J Am Coll Cardiol* 2013;**61**:2355–62.
35. Seicean S, Seicean A, Plana JC, Budd GT, Marwick TH. Effect of statin therapy on the risk for incident heart failure in patients with breast cancer receiving anthracycline chemotherapy: an observational clinical cohort study. *J Am Coll Cardiol* 2012;**60**:2384–90.
36. Yeh ET, Bickford CL. Cardiovascular complications of cancer therapy: incidence, pathogenesis, diagnosis and management. *J Am Coll Cardiol* 2009;**53**:2231–47.
